2023 | VOLUME 76 | NUMBER 2

# The American Journal of Psychotherapy

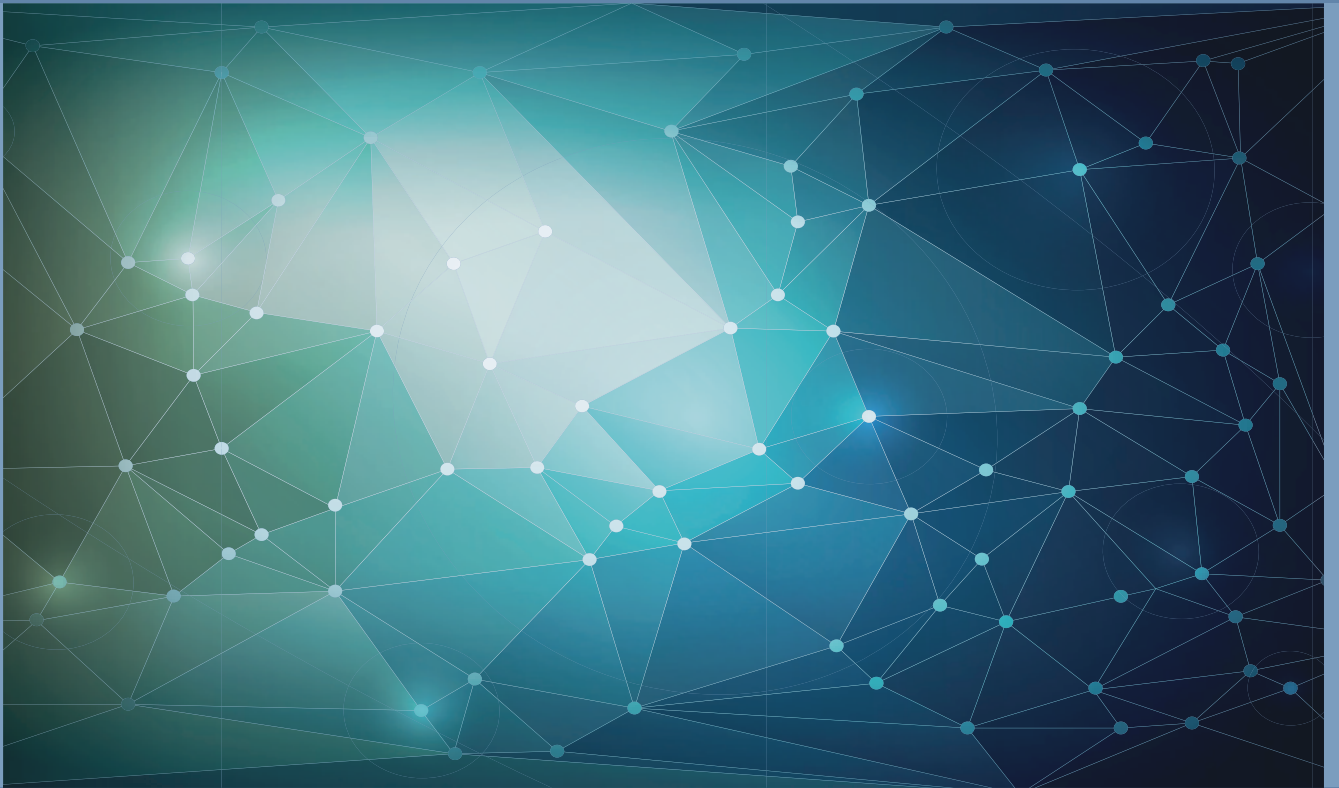

AMERICAN  
**PSYCHIATRIC**  
ASSOCIATION 

[psychotherapy.psychiatryonline.org](https://psychotherapy.psychiatryonline.org)
